# Supplementary material for: Development of Cross-Reactive Live Attenuated Influenza Vaccine Candidates against Both Lineages of Influenza B Virus
Source: MDPI journal article supplement (doi:10.3390/vaccines12010095), 2024-01-18
Supplement: s1 [file s1]

## Supplementary Materials

**Table S1.** Primer set used for RT-PCR amplification of the eight vRNAs of B/USSR60/69, HA and NA genes of B/Brisbane/60/2008 and B/Phuket/3037/2013; NA genes of 7+1 A/H2NBr and A/H2NPh.

| Primer name           | 5'-Sequence-3' (*)                                                          |
|-----------------------|-----------------------------------------------------------------------------|
| B-Uni_PB2-SapI_F      | GATCGCTCTTCAGGG <b>AGCAGAAGCGGAGCGTTTTC</b> AAGATG                          |
| B-Uni_PB2-SapI_R      | ACTGGCTCTTCTATT <b>AGTAGAAACACGAGCATT</b>                                   |
| B-Uni_PB1-SapI_F      | GATCGCTCTTCAGGG <b>AGCAGAAGCGGAGCCTTTA</b> AAGATG                           |
| B-Uni_PB1-SapI_R      | ACTGGCTCTTCTATT <b>AGTAGAAACACGAGCCTT</b>                                   |
| B-Uni_PA-SapI_F       | GATCGCTCTTCAGGG <b>AGCAGAAGCGGTGCGTTTGA</b>                                 |
| B/USSR_PA-BsmBI-1261R | TATTCGTCTCC <b>CAGGGCCCTTTTACTTGT</b> CAGAGTAC                              |
| B/USSR_PA-BsmBI-1283F | TATTCGTCTCT <b>CCTGGATCTACCAGAAATAGGGCC</b> CAGAC                           |
| B-Uni_PA-SapI_R       | ACTGGCTCTTCTATT <b>AGTAGAAACACGTGCATT</b>                                   |
| B-Uni_HA-SapI_F       | GATCGCTCTTCAGGG <b>AGCAGAAGCAGAGCATT</b> TTTCTAATATC                        |
| B-Uni_HA-SapI_R       | ACTGGCTCTTCTATT <b>AGTAGTAACAAGAGCATT</b> TTTTC                             |
| B-Uni_NP-SapI_F       | GATCGCTCTTCAGGG <b>AGCAGAAGCACAGCATT</b> TTTCTTGTG                          |
| B/USSR-NP-1411R       | <b>ACCCTCCGTCTCCACCTACTTCA</b>                                              |
| B/USSR-NP-1433F       | <b>TGAAGTAGGTGGAGACGGAGGGT</b>                                              |
| B-Uni_NP-SapI_R       | ACTGGCTCTTCTATT <b>AGTAGAAACAACAGCATT</b> TTTTTAC                           |
| B-Uni_NA-SapI_F       | GATCGCTCTTCAGGG <b>AGCAGAAGCAGAGCA</b>                                      |
| B-Uni_NA-SapI_R       | ACTGGCTCTTCTATT <b>AGTAGTAACAAGAGCATT</b> TTT                               |
| B-Uni_M-SapI_F        | GATCGCTCTTCAGGG <b>AGCAGAAGCACGCACTTTCTTAAAATG</b>                          |
| B-Uni_M-SapI_R        | ACTGGCTCTTCTATT <b>AGTAGAAACAACGCACTTTT</b> TCCAG                           |
| B-Uni_NS-SapI_F       | GATCGCTCTTCAGGG <b>AGCAGAAGCAGAGGATT</b> TGTTAGTC                           |
| B-Uni_NS-SapI_R       | ACTGGCTCTTCTATT <b>AGTAGTAACAAGAGGATT</b> TTTAT                             |
| NA_B_H2_F             | <b>AGCAAAAGCAGGAGTGAAAATGCTACCTTCAACTATAC</b>                               |
| NA_B_Bris_H2_H3_R     | <b>AGTAGAAACAAGGAGTTTTTTCTAAAATTGCGAAAGCTTACAGAGC</b><br><b>CATGTC</b>      |
| NA_B_Phu_H2_H3_R      | <b>AGTAGAAACAAGGAGTTTTTTCTAAAATTGCGAAAGCTTACAGAGT</b><br><b>CATATTAACAC</b> |

(\*) The sequences complementary to the influenza sequences are shown in bold. The 5'-ends have recognition sequences for the restriction endonuclease SapI or BsmBI. The design of the primers for PA and NP allowed the amplification of two fragments.

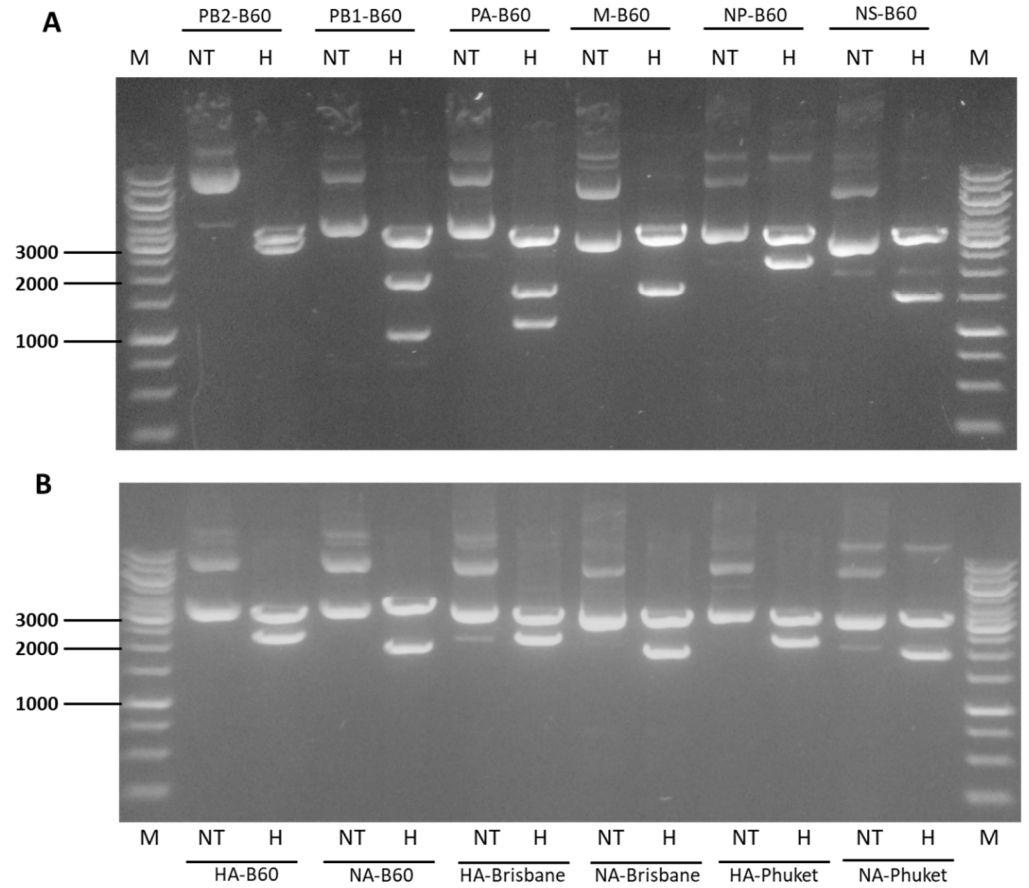

**Figure S1. (A).** RG plasmids carrying six internal protein segments of B/USSR/60/69 (B60) master donor virus, non-treated (NT) or hydrolyzed (H) with XbaI restriction enzyme. **(B).** RG plasmids carrying HA or NA segments of B/USSR/60/69 (B60) master donor virus or B/Brisbane/60/2008 or B/Phuket/3037/2013 wild-type viruses, non-treated (NT) or hydrolyzed (H) with XbaI restriction enzyme. M- DNA ladder.
